# Supplementary material for: SARS-CoV-2 Spike Protein Accumulation in the Skull-Meninges-Brain Axis: Potential Implications for Long-Term Neurological Complications in post-COVID-19
Source: bioRxiv preprint, doi:10.1101/2023.04.04.535604, version 1 (2023-04-05)
Supplement: Table 1 [file 535604_file02.pdf]

| Group                                                                                                         | Number | Sex | Age range | PMI | Comorbidities                                                                                            | Brain weight(g) | Days of disease              | PCR                             |
|---------------------------------------------------------------------------------------------------------------|--------|-----|-----------|-----|----------------------------------------------------------------------------------------------------------|-----------------|------------------------------|---------------------------------|
| COVID-19 skull/meninges                                                                                       | 1      | f   | 80-100    | 5   | Uterus myomatosis, Diverticulosis, Gall bladder stones                                                   | 1230            | n/a                          | skull-, meninges-, brain n/a    |
|                                                                                                               | 2      | f   | 60-80     | 3   | Liver zirrhosis with esophageal varices                                                                  | 1050            | n/a                          | skull+, meninges-, brain n/a    |
|                                                                                                               | 3      | f   | 40-60     | 8   | Ethanol dependency, Gastritis, Hypothyreosis                                                             | 1140            | 6                            | skull-, meninges-, brain n/a    |
|                                                                                                               | 4      | m   | 40-60     | 7   | Arterial Hypertension, Arterial disease, Asipostas                                                       | 1570            | 14                           | skull+, meninges-, brain n/a    |
|                                                                                                               | 5      | m   | 80-100    | 3   | Arteriosclerosis, coronary artery disease (3VD), COPD                                                    | 950             | 12                           | skull-, meninges n/a, brain n/a |
|                                                                                                               | 6      | m   | 40-60     | 3   | CI, IHD, DM                                                                                              | 1535            | 9                            | skull-, meninges n/a, brain n/a |
|                                                                                                               | 7      | f   | 80-100    | 5   | Emphysema, IHD, CI, CKD                                                                                  | 1030            | n/a                          | n/a                             |
|                                                                                                               | 8      | m   | 60-80     | 6   | Metastased rectal CA, mitral valve sclerosis                                                             | 1390            | n/a                          | skull-, meninges n/a, brain n/a |
|                                                                                                               | 9      | m   | 40-60     | 6   | liver cirrhosis, esophagus varicosis, CKD, emphysema                                                     | 1500            | 1                            | skull-, meninges n/a, brain n/a |
|                                                                                                               | 10     | m   | 80-100    | 4   | asbestosis, IHD, bronchial CA                                                                            | 1385            | n/a                          | skull-, meninges n/a, brain n/a |
|                                                                                                               | 11     | f   | 80-100    | 3   | Colon-CA, Apoplex, dementia, IHD                                                                         | 1290            | n/a                          | skull-, meninges n/a, brain n/a |
|                                                                                                               | 12     | m   | 60-80     | 3   | n/a                                                                                                      | 1350            | n/a                          | skull+, meninges-, brain n/a    |
|                                                                                                               | 13     | f   | 60-80     | 4   | DM                                                                                                       | 1085            | n/a                          | skull+, meninges+, brain-       |
|                                                                                                               | 14     | f   | 60-80     | 2   | JAK2 pos. Polycythemia vera, art. Hypertonie                                                             | 1380            | 55                           | skull+, meninges+, brain-       |
|                                                                                                               | 15     | m   | 60-80     | 8   | chronic kidney insufficiency, prostate carcinoma, arterial hypertension                                  | 1632            | 34                           | skull+, meninges+, brain-       |
|                                                                                                               | 16     | f   | 80-100    | 3   | breast cancer                                                                                            | 1210            | n/a                          | skull+, meninges-, brain-       |
| COVID-19 brain cortex                                                                                         | 17     | f   | 60-80     | 12  | Alzheimer's type dementia, cardiac arrhythmia, high blood pressure, chronic cardiac insufficiency        | 1365            | 3                            | skull+, meninges+, brain-       |
|                                                                                                               | 1      | f   | 60-80     | n/a | n/a                                                                                                      | n/a             | n/a                          | skull n/a, meninges n/a, brain- |
|                                                                                                               | 2      | m   | 40-60     | 4   | n/a                                                                                                      | 1698            | n/a                          | skull n/a, meninges n/a, brain- |
|                                                                                                               | 3      | n/a | n/a       | n/a | n/a                                                                                                      | n/a             | n/a                          | skull n/a, meninges n/a, brain- |
|                                                                                                               | 4      | n/a | n/a       | n/a | n/a                                                                                                      | n/a             | n/a                          | skull n/a, meninges n/a, brain- |
|                                                                                                               | 5      | n/a | n/a       | n/a | n/a                                                                                                      | n/a             | n/a                          | skull n/a, meninges n/a, brain- |
|                                                                                                               | 6      | n/a | n/a       | n/a | n/a                                                                                                      | n/a             | n/a                          | skull n/a, meninges n/a, brain- |
|                                                                                                               | 7      | n/a | n/a       | n/a | n/a                                                                                                      | n/a             | n/a                          | skull n/a, meninges n/a, brain- |
|                                                                                                               | 8      | m   | 60-80     | 1   | n/a                                                                                                      | n/a             | n/a                          | skull n/a, meninges n/a, brain- |
|                                                                                                               | 9      | m   | 80-100    | n/a | n/a                                                                                                      | n/a             | n/a                          | skull n/a, meninges n/a, brain- |
|                                                                                                               | 10     | n/a | n/a       | 2   | Essential hypertension, chronic lower respiratory diseases; Alzheimer's disease                          | 1045            | n/a                          | skull n/a, meninges+, brain-    |
| 11                                                                                                            | n/a    | n/a | n/a       | n/a | n/a                                                                                                      | n/a             | skull n/a, meninges+, brain- |                                 |
| Control skull/meninges                                                                                        | 1      | m   | 80-100    | 1   | Intestinal infections; Atherosclerosis; Heart failure                                                    | 1268            | none                         |                                 |
|                                                                                                               | 2      | m   | 60-80     | 2   | chronic ischemic heart disease; Essential hypertension nutrition/metabolic; mental/behavioral disorders; | 1270            | none                         |                                 |
|                                                                                                               | 3      | m   | 80-100    | 2   | Renal failure; heart disease                                                                             | 1183            | none                         |                                 |
|                                                                                                               | 4      | m   | 80-100    | 2   | Malignant neoplasm of prostate                                                                           | 1204            | none                         |                                 |
|                                                                                                               | 5      | n/a | n/a       | n/a | n/a                                                                                                      | n/a             | none                         |                                 |
|                                                                                                               | 6      | n/a | n/a       | n/a | n/a                                                                                                      | n/a             | none                         |                                 |
|                                                                                                               | 7      | n/a | n/a       | n/a | n/a                                                                                                      | n/a             | none                         |                                 |
|                                                                                                               | 8      | n/a | n/a       | n/a | n/a                                                                                                      | n/a             | none                         |                                 |
|                                                                                                               | 9      | n/a | n/a       | n/a | n/a                                                                                                      | n/a             | none                         |                                 |
|                                                                                                               | 10     | n/a | n/a       | n/a | n/a                                                                                                      | n/a             | none                         |                                 |
| Control brain cortex                                                                                          | 1      | m   | 40-60     | 2   | n/a                                                                                                      | n/a             | none                         |                                 |
|                                                                                                               | 2      | m   | 40-60     | 5   | n/a                                                                                                      | n/a             | none                         |                                 |
|                                                                                                               | 3      | m   | 0-20      | 3   | n/a                                                                                                      | n/a             | none                         |                                 |
|                                                                                                               | 4      | m   | 60-80     | 8   | n/a                                                                                                      | n/a             | none                         |                                 |
|                                                                                                               | 5      | f   | 80-100    | 5   | n/a                                                                                                      | n/a             | none                         |                                 |
|                                                                                                               | 6      | f   | 20-40     | 1   | n/a                                                                                                      | n/a             | none                         |                                 |
|                                                                                                               | 7      | f   | 80-100    | 3   | Mental/behavioral disorders; Essential hypertension                                                      | 1190            | none                         |                                 |
|                                                                                                               | 8      | f   | 80-100    | n/a | n/a                                                                                                      | 1150            | none                         |                                 |
| Patients died between 2021-2022                                                                               | 1      | m   | 40-60     | n/a |                                                                                                          |                 |                              |                                 |
|                                                                                                               | 2      | m   | 60-80     | 1   |                                                                                                          |                 |                              |                                 |
|                                                                                                               | 3      | m   | 80-100    | 1   |                                                                                                          |                 |                              |                                 |
|                                                                                                               | 4      | f   | 20-40     | 1   |                                                                                                          |                 |                              |                                 |
|                                                                                                               | 5      | m   | 60-80     | n/a |                                                                                                          |                 |                              |                                 |
|                                                                                                               | 6      | m   | 80-100    | 10  |                                                                                                          |                 |                              |                                 |
|                                                                                                               | 7      | m   | 60-80     | 6   |                                                                                                          |                 |                              |                                 |
|                                                                                                               | 8      | m   | 40-60     | n/a |                                                                                                          |                 |                              |                                 |
|                                                                                                               | 9      | f   | 60-80     | n/a |                                                                                                          |                 |                              |                                 |
|                                                                                                               | 10     | m   | 60-80     | n/a |                                                                                                          |                 |                              |                                 |
|                                                                                                               | 11     | m   | 40-60     | 1   |                                                                                                          |                 |                              |                                 |
|                                                                                                               | 12     | m   | 40-60     | 1   |                                                                                                          |                 |                              |                                 |
|                                                                                                               | 13     | m   | 80-100    | 1   |                                                                                                          |                 |                              |                                 |
|                                                                                                               | 14     | f   | 60-80     | 1   |                                                                                                          |                 |                              |                                 |
|                                                                                                               | 15     | f   | 60-80     | 1   |                                                                                                          |                 |                              |                                 |
|                                                                                                               | 16     | m   | 60-80     | 1   |                                                                                                          |                 |                              |                                 |
|                                                                                                               | 17     | m   | 80-100    | n/a |                                                                                                          |                 |                              |                                 |
|                                                                                                               | 18     | m   | 40-60     | n/a |                                                                                                          |                 |                              |                                 |
|                                                                                                               | 19     | f   | 40-60     | n/a |                                                                                                          |                 |                              |                                 |
|                                                                                                               | 20     | f   | 60-80     | 13  |                                                                                                          |                 |                              |                                 |
|                                                                                                               | 21     | m   | 40-60     | 11  |                                                                                                          |                 |                              |                                 |
|                                                                                                               | 22     | f   | 80-100    | 12  |                                                                                                          |                 |                              |                                 |
|                                                                                                               | 23     | m   | 60-80     | 10  |                                                                                                          |                 |                              |                                 |
|                                                                                                               | 24     | m   | 40-60     | n/a |                                                                                                          |                 |                              |                                 |
|                                                                                                               | 25     | m   | 80-100    | n/a |                                                                                                          |                 |                              |                                 |
|                                                                                                               | 26     | f   | 80-100    | n/a |                                                                                                          |                 |                              |                                 |
|                                                                                                               | 27     | m   | 60-80     | n/a |                                                                                                          |                 |                              |                                 |
|                                                                                                               | 28     | f   | 80-100    | n/a |                                                                                                          |                 |                              |                                 |
|                                                                                                               | 29     | f   | 80-100    | n/a |                                                                                                          |                 |                              |                                 |
|                                                                                                               | 30     | f   | 20-40     | n/a |                                                                                                          |                 |                              |                                 |
|                                                                                                               | 31     | n/a | n/a       | n/a |                                                                                                          |                 |                              |                                 |
|                                                                                                               | 32     | n/a | n/a       | n/a |                                                                                                          |                 |                              |                                 |
|                                                                                                               | 33     | m   | 60-80     | 19  |                                                                                                          |                 |                              |                                 |
|                                                                                                               | 34     | m   | 20-40     | 1   |                                                                                                          |                 |                              |                                 |
| n/a: not available                                                                                            |        |     |           |     |                                                                                                          |                 |                              |                                 |
| PMI: postmortem interval (days)                                                                               |        |     |           |     |                                                                                                          |                 |                              |                                 |
| nary disease, DM: diabetes mellitus, IHD: ischemic heart disease, RI: renal insufficiency, Tx Transplantation |        |     |           |     |                                                                                                          |                 |                              |                                 |
